# Supplementary material for: Characterization of the endogenous DAF-12 ligand and its use as an anthelmintic agent in Strongyloides stercoralis
Source: eLife journal article supplement (doi:10.7554/elife.73535), 2021-11-12

Figure 4-figure supplement 1. Full gel images for the expression of Ss-CYPs.

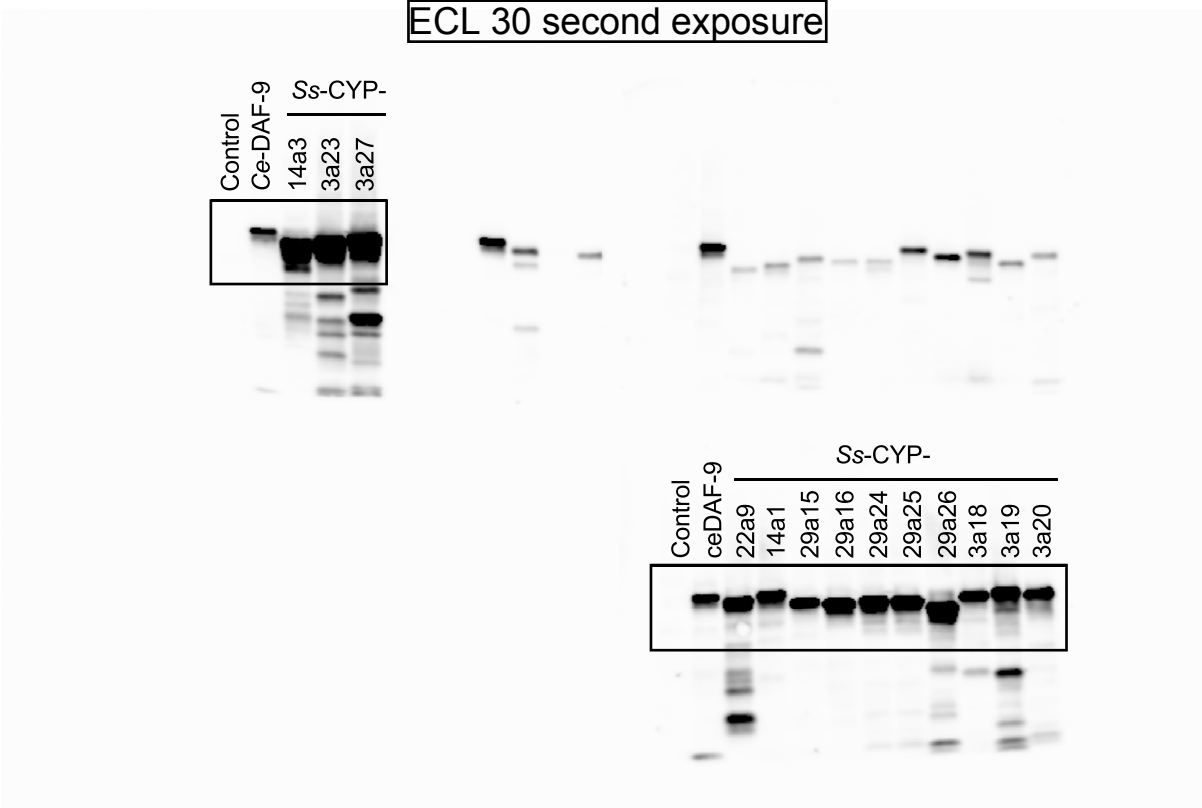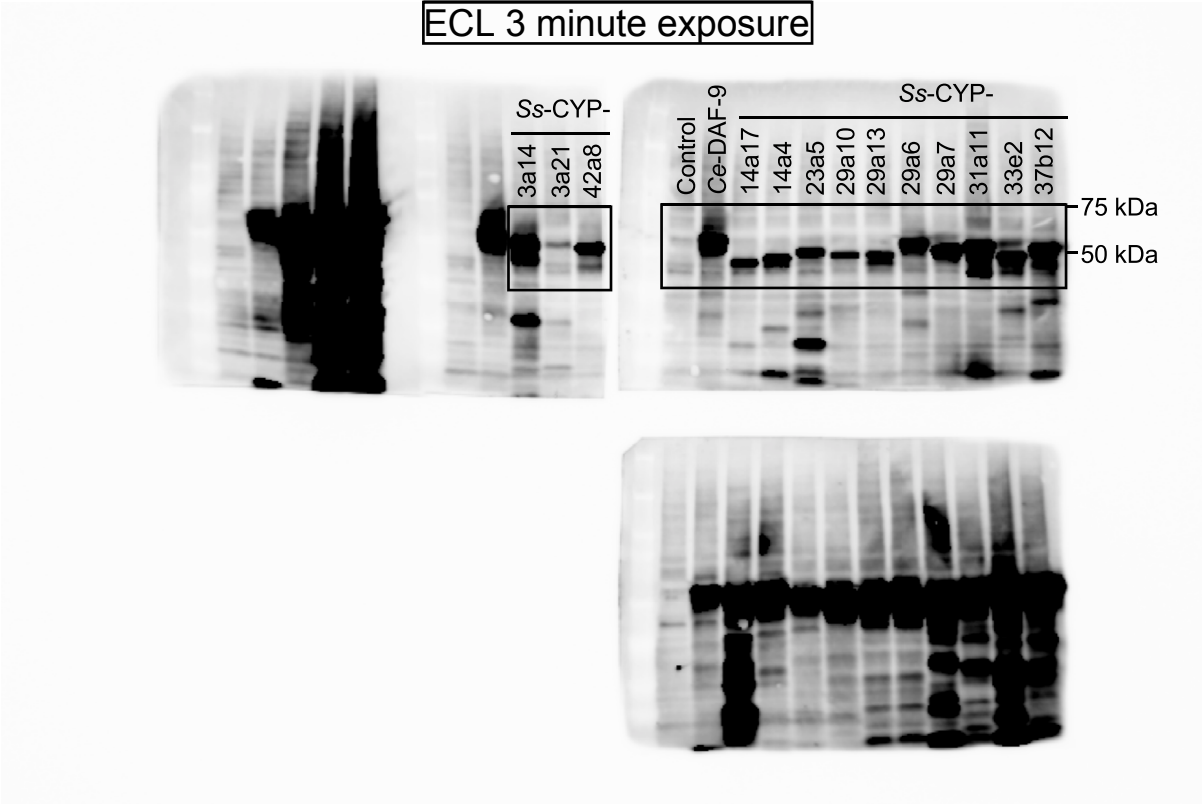

Supplement: fig4-figsupp1-data1 [file elife-73535-fig4-figsupp1-data1-v2.pdf]
