# Supplementary material for: Characterization of the endogenous DAF-12 ligand and its use as an anthelmintic agent in Strongyloides stercoralis
Source: eLife journal article supplement (doi:10.7554/elife.73535), 2021-11-12

Figure 5B. Full gel images for single worm genotyping

2020-07-31 22a9 genotyping 2nd

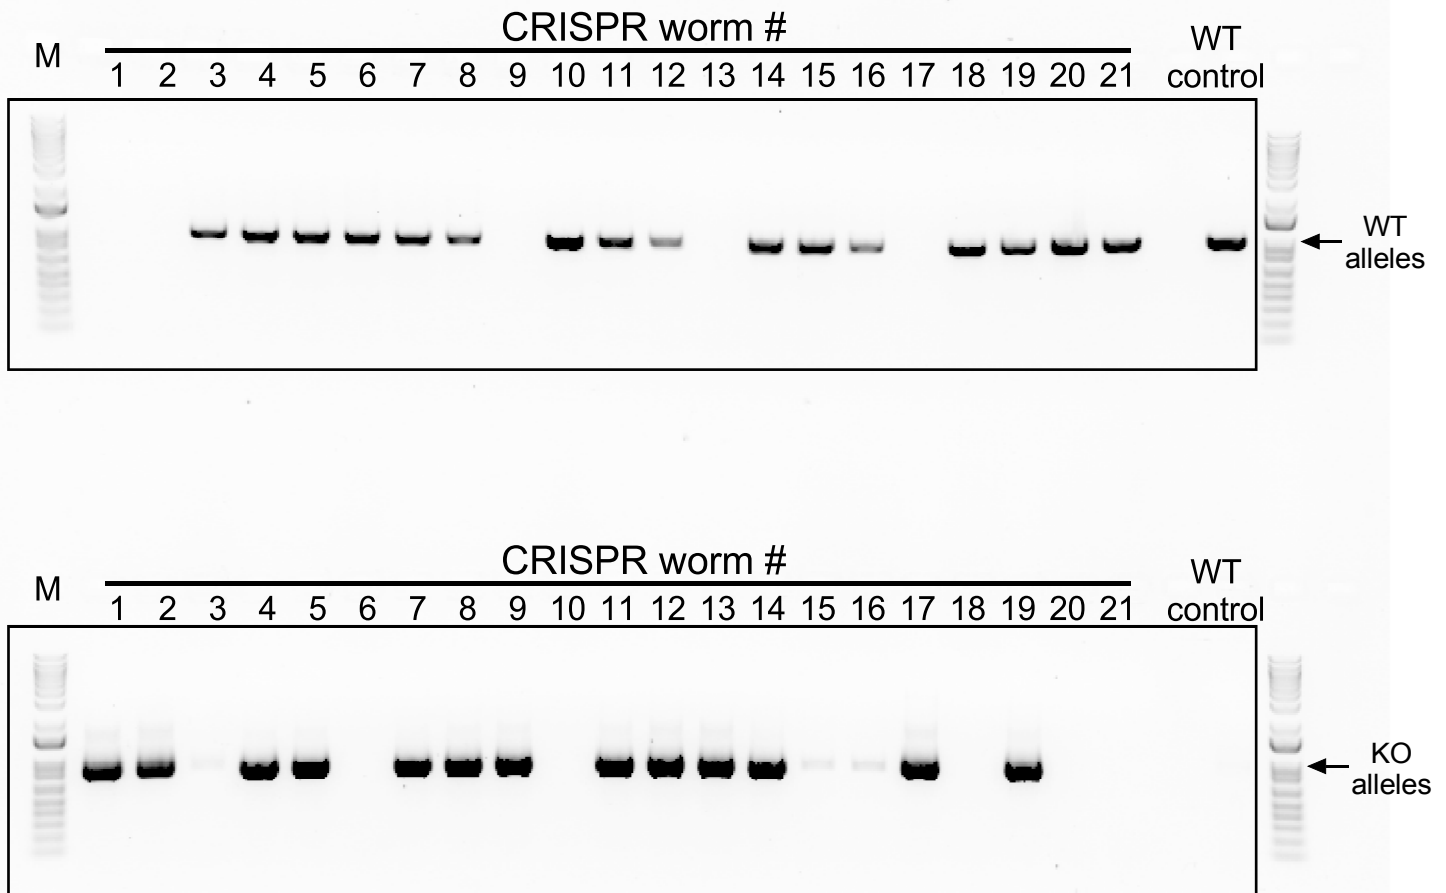

Supplement: fig5-data1 [file elife-73535-fig5-data1-v2.pdf]
